# Supplementary material for: Rationale and design of the Early Chronic Obstructive Pulmonary Disease (ECOPD) study in Guangdong, China: a prospective observational cohort study
Source: PubMed Central journal article supplement — J Thorac Dis. 2021 Dec;13(12):6924–35. doi: 10.21037/jtd-21-1379 (PMC8743397; doi:10.21037/jtd-21-1379), 2021-12
Supplement: jtd-13-12-6924-supplementary.pdf [file jtd-13-12-6924-supplementary.pdf]

**Appendix 1**

**CT Assessment Scoresheet**

|                       |  |
|-----------------------|--|
| Site ID               |  |
| Subject ID            |  |
| CT Scan Date          |  |
| CT Technologist       |  |
| Scanner Name/Location |  |

**CT Image Acquisition**

| Completed                | Scan        | Breath-hold time | mA or mAs | Reconstructed collimation | CT Dose Index |
|--------------------------|-------------|------------------|-----------|---------------------------|---------------|
| <input type="checkbox"/> | Inspiratory |                  |           |                           |               |
| <input type="checkbox"/> | Expiratory  |                  |           |                           |               |

**CT Assessment Scoresheet**

- Adequate Inspiration Yes No
- Motion Artifact Yes No
- Inclusion of All Parts of Lungs Yes No
- Adequate Expiration Yes No

**Comments**

---

Radiologist 1 Signature

---

Radiologist 2 Signature

*\* Findings of concern should be communicated to PI*

## Exam quality

**Adequate Inspiration:** Adequacy of inspiration should be judged subjectively.

**Inclusion of Entire Lung:** All parts of the lung must be included.

**Respiratory Motion Artifact:** Respiratory motion artifact should be recorded. If respiratory artifact affects more than 1 cm of lung on inspiration or on expiration, the scan should be repeated. Respiratory motion artifact can be distinguished from transmitted cardiac motion by the fact that cardiac motion predominantly affects the left lower lung.

**Adequate Expiration:** Adequacy of expiration should be judged subjectively, and by determining whether the posterior tracheal membrane is infolded.

### Concern for cancer

Noncalcified, non-fatty nodule >8 mm

Endobronchial mass

### Concern for clinically significant ILD

ILD affecting more than 10% of lung parenchyma

### Concern for clinically significant bronchiectasis

Varicose or cystic bronchiectasis

Cylindric bronchiectasis with tree-in-bud pattern

*\* Findings of concern should be communicated to PI*
